# Supplementary material
Source: PubMed Central journal article supplement (PMC4262604)
Supplement: NIHMS606772-supplement-01.pdf [file NIHMS606772-supplement-01.pdf]

### **Supplemental Figure 1: FTIR and NOESY Spectra**

**A:** FTIR Spectrum of the SDS-buffer soluble extracellular biofilm material produced by NTHi (day 4).

**B:** NOESY spectrum of the DMSO-soluble fraction of the extracellular biofilm material produced by NTHi (day 4).

### **Supplemental Table 1: Proteins detected in planktonic bacteria only**

List of proteins identified by proteomic analysis present in planktonic bacteria (107 proteins) and found in planktonic and 24 hr biofilm bacteria (31 proteins), or planktonic and 96 hr biofilm bacteria (15 proteins).

### **Supplemental Table 2: Biofilm specific proteins retained on filters after removal of biofilm, identified by LC/MS/MS**

List of proteins identified by proteomic analysis present on filters after NTHi biofilms had been removed by washing.
